# Supplementary material for: Conjugation of Palbociclib with MHI-148 Has an Increased Cytotoxic Effect for Breast Cancer Cells and an Altered Mechanism of Action
Source: MDPI journal article supplement (doi:10.3390/molecules27030880), 2022-01-27
Supplement: s1 [file s1]

Supplementary Materials

Conjugation of Palbociclib with MHI-148 has an Increased Cytotoxic Effect for Breast Cancer Cells and an Altered Mechanism of Action

Peter Jaein Choi <sup>1,2</sup>, Petr Tomek <sup>1</sup>, Moana Tercel <sup>1,2</sup>, Jóhannes Reynisson <sup>3</sup>, Thomas In Hyeup Park <sup>4</sup>, Elizabeth Alexandra Cooper <sup>4</sup>, William Alexander Denny <sup>1,2</sup>, Jiney Jose <sup>1,2,\*</sup> and Euphemia Leung <sup>1,2,\*</sup>

<sup>1</sup> Auckland Cancer Society Research Centre, Faculty of Medical and Health Sciences, University of Auckland, Auckland 1023, New Zealand; p.choi@auckland.ac.nz (P.J.C.); p.tomek@auckland.ac.nz (P.T.); m.tercel@auckland.ac.nz (M.T.); b.denny@auckland.ac.nz (W.A.D.)#  
<sup>2</sup> Maurice Wilkins Centre for Molecular Biodiscovery, University of Auckland, Auckland 1023, New Zealand  
<sup>3</sup> School of Pharmacy and Bioengineering, Keele University, Hornbeam Building, Newcastle under Lyme, ST5 5BG Staffordshire, UK; j.reynisson@keele.ac.uk  
<sup>4</sup> Neurosurgical Research Unit & Department of Pharmacology, The Centre for Brain Research, University of Auckland, Private Bag 92019, Auckland 1023, New Zealand; Thomas.park@auckland.ac.nz (T.I.H.P.); e.cooper@auckland.ac.nz (E.A.C.)  
\* Correspondence: j.jose@auckland.ac.nz (J.J.); e.leung@auckland.ac.nz (E.L.)#

**Supplementary Table S1.** EC<sub>50</sub> values of palbociclib, MHI-148 and MHI-palbociclib in breast cancer MCF-7 and MDA-MB-231 cell lines, and non-cancerous HEK293, 51D1 and 51D1.3 cell lines using WST-1 assay.

|                                      |                 | MCF-7        | MDA-MB-231   | HEK293      | 51D1         | 51D1.3       |
|--------------------------------------|-----------------|--------------|--------------|-------------|--------------|--------------|
| EC <sub>50</sub> (nM)<br>WST-1 assay | Palbociclib     | >2500        | >2500        | >2500       | >2500        | >2500        |
|                                      | MHI-148         | >2500        | >2500        | >2500       | >2500        | >2500        |
|                                      | MHI-palbociclib | 718.8 ± 74.1 | 871.6 ± 98.9 | 543.8 ± 5.9 | 265.0 ± 20.3 | 471.3 ± 61.2 |
